# Supplementary material
Source: PubMed Central journal article supplement (PMC5691423)
Supplement: AEM.01550-17_zam999118179s1.pdf [file AEM.01550-17_zam999118179s1.pdf]

**TABLE S1** Numbers of sequences and the observed OTUs, estimated OTU richness (Ace, Chao 1), diversity index (Shannon), and estimated sample coverage for 16S rRNA gene libraries of MT-Daqu samples.

| Sample ID | Raw reads | Trim reads | coverage | OTUs | Ace | Chao | Shannon |
|-----------|-----------|------------|----------|------|-----|------|---------|
| Day 0     | 1564      | 1144       | 96.71%   | 64   | 138 | 127  | 2.21    |
| Day 2     | 2161      | 1729       | 98.71%   | 80   | 101 | 92   | 2.80    |
| Day 4     | 1544      | 1129       | 95.83%   | 134  | 218 | 183  | 3.97    |
| Day 6     | 1595      | 1151       | 97.39%   | 96   | 126 | 118  | 3.25    |
| Day 8     | 1582      | 1081       | 98.51%   | 78   | 90  | 87   | 3.49    |
| Day 10    | 1882      | 1073       | 97.39%   | 73   | 103 | 105  | 2.55    |
| Day 12    | 1451      | 1071       | 98.13%   | 74   | 91  | 91   | 3.22    |
| Day 17    | 1860      | 1314       | 98.16%   | 81   | 104 | 98   | 3.03    |
| Day 27    | 15592     | 11749      | 98.94%   | 263  | 836 | 481  | 3.54    |
| Day 32    | 2856      | 2057       | 98.44%   | 93   | 131 | 138  | 3.21    |

**TABLE S2** Number of sequences and the observed OTUs, estimated OTU richness (Ace, Chao 1), diversity index (Shannon), and estimated sample coverage for ITS rRNA gene libraries of MT-Daqu samples

| Sample ID | Raw reads | Trim Reads | coverage | OTUs | Ace | Chao | Shannon |
|-----------|-----------|------------|----------|------|-----|------|---------|
| Day 0     | 88206     | 87707      | 99.99%   | 105  | 110 | 107  | 1.98    |
| Day 2     | 57036     | 56864      | 99.96%   | 99   | 123 | 111  | 2.14    |
| Day 4     | 96710     | 96495      | 99.99%   | 89   | 99  | 98   | 1.67    |
| Day 6     | 51620     | 51287      | 99.97%   | 104  | 117 | 115  | 2.6     |
| Day 8     | 49797     | 49578      | 99.96%   | 78   | 96  | 91   | 1.96    |
| Day 10    | 36426     | 36187      | 99.97%   | 59   | 72  | 67   | 1.1     |
| Day 12    | 46299     | 45618      | 99.97%   | 81   | 90  | 87   | 1.44    |
| Day 17    | 39277     | 38819      | 99.96%   | 70   | 86  | 85   | 1.46    |
| Day 27    | 33016     | 32778      | 99.93%   | 86   | 112 | 118  | 2.19    |
| Day 32    | 37538     | 37097      | 99.97%   | 54   | 66  | 63   | 1.18    |

**TABLE S3** Bacterial OTUs differentially distributed in the MT-Daqu microbiotas formed at different temperature

| OTU ID | T37 <sup>a</sup> |          | T50      |          | P-value | Taxonomy                                |
|--------|------------------|----------|----------|----------|---------|-----------------------------------------|
|        | Mean (%)         | Variance | Mean (%) | Variance |         |                                         |
| OTU010 | 13.09            | 0.04     | 22.73    | 0.02     | 0.01    | <i>Bacillus licheniformis</i>           |
| OTU017 | 1.75             | 0.00     | 5.24     | 0.04     | 0.04    | <i>Thermoactinomyces vulgaris</i>       |
| OTU022 | 0.24             | 0.00     | 9.16     | 0.01     | 0.00    | <i>Lactobacillus fermentum</i>          |
| OTU027 | 0.03             | 0.00     | 0.08     | 0.00     | 0.01    | <i>Lactobacillus buchneri</i>           |
| OTU041 | 0.01             | 0.00     | 0.11     | 0.00     | 0.04    | <i>Staphylococcus sciuri subsp</i>      |
| OTU042 | 0.05             | 0.00     | 0.18     | 0.00     | 0.02    | <i>Lactobacillus paracasei</i>          |
| OTU071 | 5.83             | 0.02     | 9.54     | 0.00     | 0.03    | <i>Lactobacillus farciminis</i>         |
| OTU004 | 4.34             | 0.01     | 0.43     | 0.00     | 0.02    | <i>Staphylococcus gallinarum strain</i> |
| OTU016 | 2.26             | 0.00     | 0.68     | 0.00     | 0.03    | <i>Lactobacillus brevis</i>             |
| OTU044 | 4.36             | 0.03     | 0.78     | 0.00     | 0.04    | <i>Pediococcus pentosaceus</i>          |
| OTU058 | 26.48            | 0.01     | 21.31    | 0.08     | 0.04    | <i>Weissella confusa</i>                |
| OTU116 | 3.44             | 0.00     | 0.79     | 0.00     | 0.01    | <i>Lactobacillus plantarum</i>          |
| OTU122 | 0.11             | 0.00     | 0.00     | 0.00     | 0.00    | <i>Saccharopolyspora rectivirgula</i>   |

<sup>a</sup> MT-Daqu bricks with the temperature of  $52.5\pm 0.8$  °C in the fermentation room after 4 d of fermentation were moved to two different rooms with controlled temperatures at 50 °C (T50 group) and 37 °C (T37 group), respectively. Red background, 7 bacterial OTUs showing higher relative abundance in MT-Daqu microbiota in the T50 group; Blue background, 6 bacterial taxa showing higher relative abundance in MT-Daqu fermented at 37 °C.

**TABLE S4** Fungal OTUs differentially distributed in the MT-Daqu microbiotas formed at different temperature

| OTU ID | T37 <sup>a</sup> |          | T50      |          | P-value | Taxonomy                          |
|--------|------------------|----------|----------|----------|---------|-----------------------------------|
|        | Mean (%)         | Variance | Mean (%) | Variance |         |                                   |
| OTU010 | 0.30             | 0.00     | 0.68     | 0.00     | 0.01    | <i>Thermoascus sp</i>             |
| OTU043 | 45.08            | 13.44    | 98.01    | 0.00     | 0.03    | <i>Thermoascus sp</i>             |
| OTU004 | 0.91             | 0.00     | 0.00     | 0.00     | 0.02    | <i>Aspergillus penicillioides</i> |
| OTU016 | 0.64             | 0.00     | 0.04     | 0.00     | 0.02    | <i>Epicoccum nigrum</i>           |
| OTU028 | 0.01             | 0.00     | 0.00     | 0.00     | 0.04    | <i>Cladosporium ramotenellum</i>  |
| OTU045 | 0.60             | 0.00     | 0.06     | 0.00     | 0.03    | <i>Gibberella zeae</i>            |
| OTU051 | 46.28            | 9.29     | 0.01     | 0.00     | 0.01    | <i>Aspergillus amstelodami</i>    |

<sup>a</sup> MT-Daqu bricks with the temperature of  $52.5\pm 0.8$  °C in the fermentation room after 4 d of fermentation were moved to two different rooms with controlled temperatures at 50 °C (T50 group) and 37 °C (T37 group), respectively. Red background, 2 fungal OTUs with higher relative abundance in MT-Daqu microbiota fermented at 50 °C; Blue background, 5 fungal taxa with higher relative abundance in MT-Daqu fermented at 37 °C.

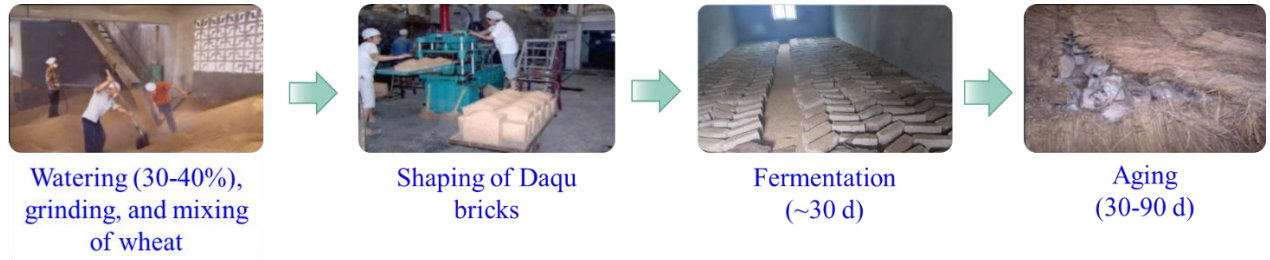

**FIG S1** A flow diagram of MT-Daqu production

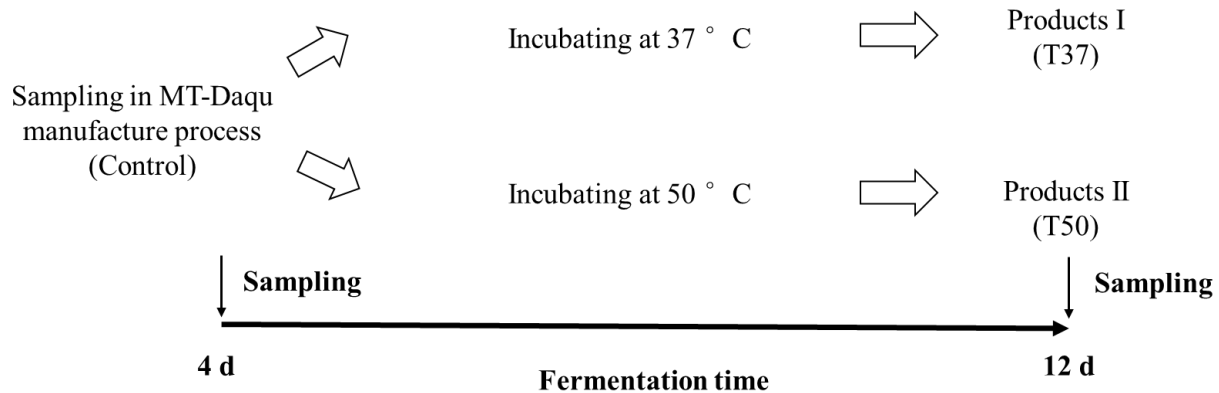

**FIG S2** A flow diagram of exploring microbes differentially distributed in the MT-Daqu microbiotas formed at different temperature

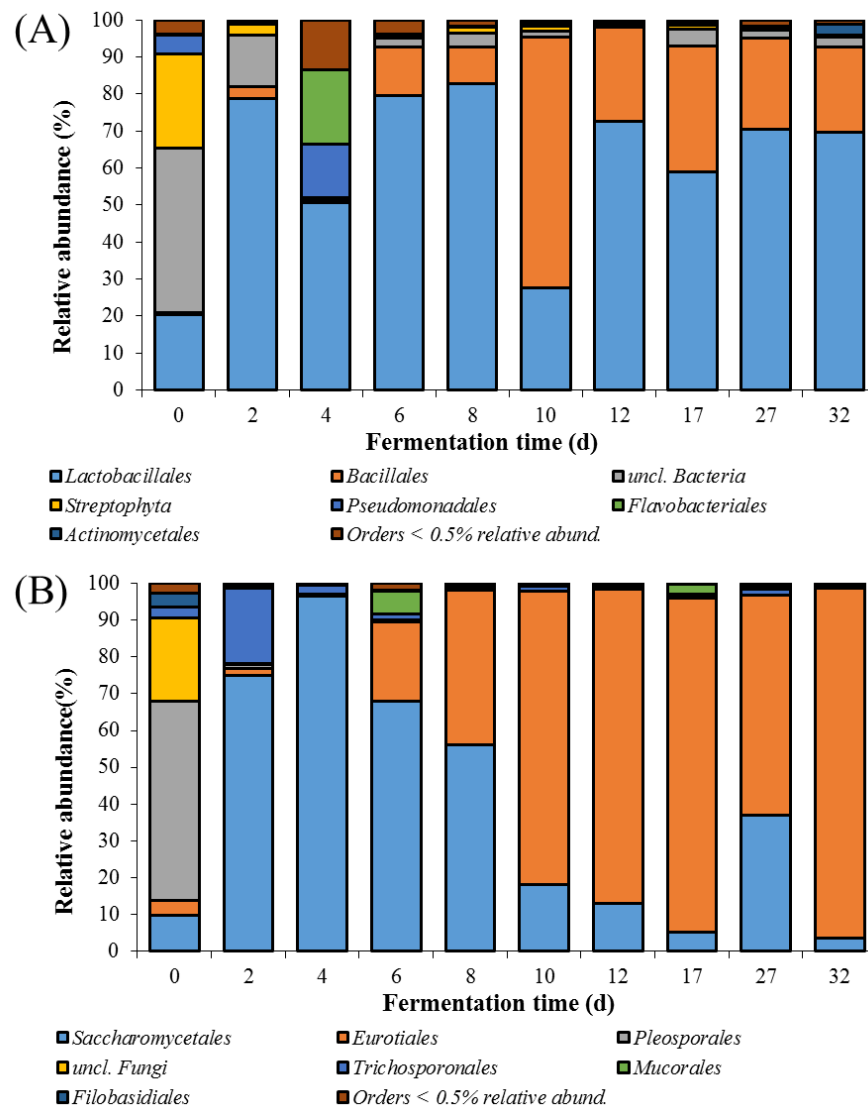

**FIG S3** Temporal patterns of microbial community during the fermentation process of MT-Daqui.

(A) Temporal profile for the relative abundance of bacterial taxa represented at the order level; (B)

Temporal profile for the relative abundance of fungal taxa represented at the order level.

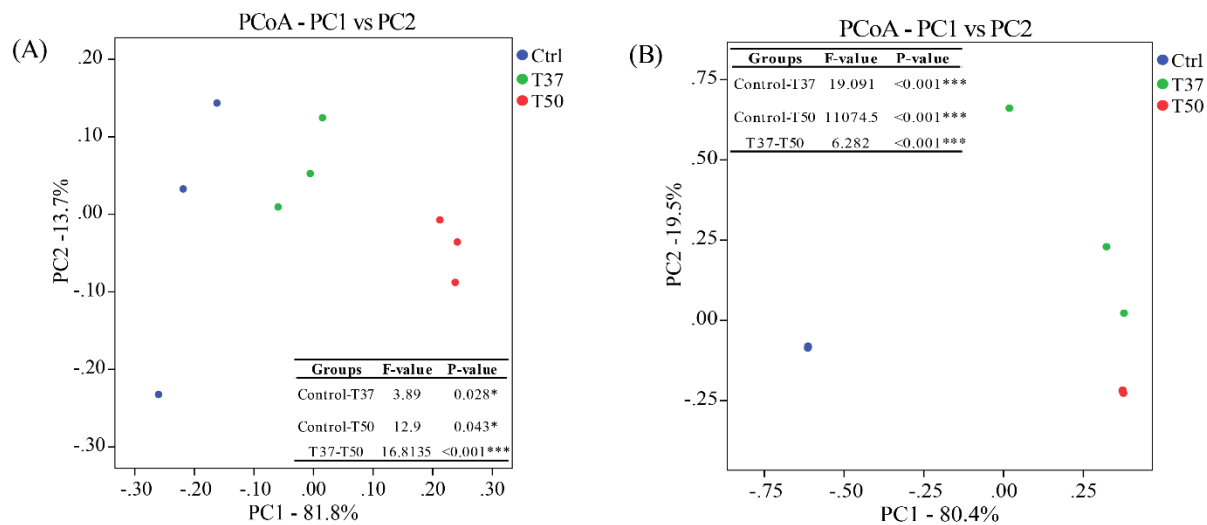

**FIG S4** Comparison the structures of bacterial community (A) and fungal community (B) based on Bray-Curtis distance matrices. MT-Daqu bricks in the fermentation room after 4 d of fermentation (Ctrl group) were moved to two different rooms with controlled temperatures at 50 °C (T50 group) and 37 °C (T37 group), respectively. *P*-values<0.05 showed that significant difference of community structure existed between two treatment groups.
